# Supplementary material for: Recent advances in rechargeable aqueous magnesium-ion batteries
Source: Royal Society of Chemistry journal article supplement (doi:10.1039/d4ta03970j), 2024-01-01
Supplement: d4ta03970j1.pdf [file d4ta03970j1.pdf]

*Review*

## **Recent Advances in Rechargeable Aqueous Magnesium-ion Batteries**

Xiaoman Ye,<sup>a</sup> Xuemei Xiao,<sup>a</sup> Zhijing Wu,<sup>a</sup> Yi Zhan,<sup>a,\*</sup> Xin Wu,<sup>a,\*</sup> and Sheng Liu<sup>a,b,\*</sup>

<sup>a</sup> School of Chemical Engineering and Technology, Sun Yat-sen University, Zhuhai 519082, China.

<sup>b</sup> The Key Lab of Low-Carbon Chemistry & Energy Conservation of Guangdong Province, Sun Yat-sen University, Guangzhou 510275, China.

\*Corresponding authors:

Dr./Assoc. Prof. Yi Zhan, E-mail: zhany9@mail.sysu.edu.cn;

Dr./Assoc. Prof. Xin Wu, E-mail: wuxin28@mail.sysu.edu.cn;

Dr./Assoc. Prof. Sheng Liu, E-mail: liusheng3@mail.sysu.edu.cn.

**Table S1.** Electrochemical performances of various cathodes for AMIBs.

| Cathode                                | Electrolyte                              | Current collector | Work Voltage (Mg/Mg <sup>2+</sup> ) | Discharge potential (Mg /Mg <sup>2+</sup> ) | Current density (mA g <sup>-1</sup> ) | Discharge capacity (mAh g <sup>-1</sup> ) | Cycle number (n) | Capacity retention (%) | Ref. |
|----------------------------------------|------------------------------------------|-------------------|-------------------------------------|---------------------------------------------|---------------------------------------|-------------------------------------------|------------------|------------------------|------|
| $\lambda$ -MnO <sub>2</sub>            | 1 M MgCl <sub>2</sub>                    | carbon cloth      | 2.20~3.75                           | 3.65                                        | 136                                   | 250.0                                     | 300              | 61.5                   | [1]  |
| $\lambda$ -MnO <sub>2</sub> /MWCNTs    | 0.5 M MgSO <sub>4</sub>                  | carbon cloth      | 2.30~2.70                           | 2.40                                        | 1000                                  | 124.1                                     | 1000             | 86.2                   | [2]  |
| B-MnO <sub>2</sub>                     | 0.5 M Mg(ClO <sub>4</sub> ) <sub>2</sub> | stainless steel   | 2.37~2.97                           | 2.80                                        | 2000                                  | 88.6                                      | 10000            | 62.5                   | [3]  |
| $\delta$ -MnO <sub>2</sub>             | 1 M MgSO <sub>4</sub>                    | Ti                | 2.37~2.77                           | 2.47                                        | 3000                                  | 75.0                                      | 1500             | 84.0                   | [4]  |
| $\delta$ -MnO <sub>2</sub> @CMS        | 0.5 M Mg(NO <sub>3</sub> ) <sub>2</sub>  | carbon cloths     | 2.40~2.75                           | 2.65                                        | 50                                    | 224.1                                     | 300              | 60.5                   | [5]  |
| $\delta$ -MnO <sub>2</sub> @ MWCNTs/CC | 0.5 M MgSO <sub>4</sub>                  | carbon cloths     | 2.40~2.80                           | 2.65                                        | 1000                                  | 75.2                                      | 1150             | 80.0                   | [6]  |
| $\alpha$ -MnO <sub>2</sub>             | 1 M MgSO <sub>4</sub>                    | nickel foam       | 2.40~2.90                           | 2.70                                        | 500                                   | 87.5                                      | N/A              | N/A                    | [7]  |
| $\alpha$ -MnO <sub>2</sub> /CNT        | 1 M MgSO <sub>4</sub>                    | nickel foam       | 2.30~2.80                           | 2.55                                        | 10000                                 | 67.0                                      | 1000             | 85.0                   | [7]  |
| electro-conversion Mg-birnessite       | 0.5 M Mg(ClO <sub>4</sub> ) <sub>2</sub> | carbon cloths     | 2.37~2.77                           | 2.57                                        | 2000                                  | 130.0                                     | 3000             | 73.6                   | [8]  |

| Cathode                                                              | Electrolyte                             | Current collector | Work Voltage (Mg/Mg <sup>2+</sup> ) | Discharge potential (Mg /Mg <sup>2+</sup> ) | Current density (mA g <sup>-1</sup> ) | Discharge capacity (mAh g <sup>-1</sup> ) | Cycle number (n) | Capacity retention (%) | Ref. |
|----------------------------------------------------------------------|-----------------------------------------|-------------------|-------------------------------------|---------------------------------------------|---------------------------------------|-------------------------------------------|------------------|------------------------|------|
| $\delta$ -MnO <sub>2</sub> /MWCNTs                                   | 0.5 M MgSO <sub>4</sub>                 | carbon cloths     | 2.52~2.80                           | 2.60                                        | 1000                                  | 45.1                                      | 500              | >100                   | [9]  |
| $\epsilon$ -MnO <sub>2</sub>                                         | 1 M MgCl <sub>2</sub>                   | carbon cloths     | 2.67~2.97                           | 2.82                                        | 2000                                  | 100.0                                     | 400              | 94.3                   | [10] |
| Mn <sub>3</sub> O <sub>4</sub>                                       | 1 M MgSO <sub>4</sub>                   | carbon cloths     | 2.80~3.00                           | 2.90                                        | 200                                   | 95.8                                      | 2000             | 99.4                   | [11] |
| LiMn <sub>2</sub> O <sub>4</sub>                                     | 1 M Mg(NO <sub>3</sub> ) <sub>2</sub>   | stainless steel   | 2.40~2.70                           | 2.50                                        | 45400                                 | 42.0                                      | 20               | 83.3                   | [12] |
| Li <sub>0.21</sub> MnO <sub>2</sub> ·H <sub>2</sub> O                | 0.5 M Mg(NO <sub>3</sub> ) <sub>2</sub> | carbon cloths     | 2.50~3.20                           | 2.80                                        | 100                                   | 165.8                                     | 300              | 56.3                   | [13] |
| Mg <sub>1/3</sub> Ni <sub>1/3</sub> Mn <sub>2/3</sub> O <sub>2</sub> | 1 M Mg(NO <sub>3</sub> ) <sub>2</sub>   | carbon cloths     | 2.50~3.40                           | 3.32                                        | 1000                                  | 100.0                                     | 200              | 50.6                   | [14] |
| Mg-OMS-1                                                             | 0.2 M MgCl <sub>2</sub>                 | carbon cloths     | 2.30~2.65                           | 2.50                                        | 100                                   | ~110                                      | 200              | 86.0                   | [15] |
| Mg-OMS-7                                                             | 0.2 M Mg(NO <sub>3</sub> ) <sub>2</sub> | carbon cloths     | 2.40~3.00                           | 2.80                                        | 100                                   | 102.0                                     | 200              | 95.3                   | [16] |
| 10% Nb K-OMS-2                                                       | 0.5 M Mg(NO <sub>3</sub> ) <sub>2</sub> | carbon cloths     | 2.00~2.90                           | 2.80                                        | 100                                   | 175.0                                     | 200              | 38.6                   | [17] |
| 10% V K-OMS-2                                                        | 0.5 M Mg(NO <sub>3</sub> ) <sub>2</sub> | carbon cloths     | 2.00~2.90                           | 2.80                                        | 100                                   | 180.0                                     | 200              | 36.8                   | [17] |
| MgMn <sub>2</sub> O <sub>4</sub>                                     | 0.5 M MgCl <sub>2</sub>                 | carbon paper      | 2.45~2.90                           | 2.70                                        | 1000                                  | 82.8                                      | 1000             | 94.2                   | [18] |
| MgMn <sub>2</sub> O <sub>4</sub> /rGO                                | 0.5 M MgCl <sub>2</sub>                 | carbon paper      | 2.40~2.80                           | 2.70                                        | 1000                                  | 140.1                                     | 1000             | 85.3                   | [18] |
| buserite Mg-Mn oxide                                                 | 0.5 M MgCl <sub>2</sub>                 | carbon cloths     | 2.30~3.10                           | 2.65                                        | 1000                                  | ~164                                      | 100              | ~80.0                  | [19] |

| Cathode                                                | Electrolyte                                        | Current collector | Work Voltage (Mg/Mg <sup>2+</sup> ) | Discharge potential (Mg /Mg <sup>2+</sup> ) | Current density (mA g <sup>-1</sup> ) | Discharge capacity (mAh g <sup>-1</sup> ) | Cycle number (n) | Capacity retention (%) | Ref. |
|--------------------------------------------------------|----------------------------------------------------|-------------------|-------------------------------------|---------------------------------------------|---------------------------------------|-------------------------------------------|------------------|------------------------|------|
| T-MgMn <sub>2</sub> O <sub>4</sub>                     | 1 M MgSO <sub>4</sub>                              | carbon cloths     | 2.17~2.67                           | 2.37                                        | 100                                   | 225.0                                     | 360              | ≈100                   | [20] |
| Mg <sub>2</sub> MnO <sub>4</sub>                       | 1 M MgSO <sub>4</sub> +<br>0.1 M MnSO <sub>4</sub> | stainless steel   | 2.75~3.37                           | 2.96                                        | 800                                   | 71.7                                      | 50               | >100                   | [21] |
| MgMn <sub>2</sub> O <sub>4</sub> -7.5/MWCNTs           | 0.5 M MgSO <sub>4</sub>                            | carbon cloths     | 2.10~2.80                           | 2.30                                        | 1000                                  | 125.8                                     | 2000             | 81.8                   | [22] |
| Flower-like MgMn <sub>2</sub> O <sub>4</sub>           | 0.5 M Mg(NO <sub>3</sub> ) <sub>2</sub>            | Ti                | 2.35~2.90                           | 2.75                                        | 100                                   | 20.0                                      | 50               | >100                   | [23] |
| EMgMn <sub>2</sub> O <sub>4</sub> /MWCNTs              | 0.5 M MgSO <sub>4</sub>                            | carbon cloths     | 2.30~2.75                           | 2.65                                        | 1000                                  | 145.0                                     | 1000             | 73.3                   | [24] |
| MgFe <sub>1.33</sub> Mn <sub>0.67</sub> O <sub>4</sub> | 0.5 M MgCl <sub>2</sub>                            | carbon cloths     | 2.50~3.60                           | 2.80                                        | 1000                                  | ~50                                       | 1000             | >100                   | [25] |
| NaMnTiO-5                                              | 0.5 M MgCl <sub>2</sub>                            | carbon cloths     | 2.40~3.00                           | 2.70                                        | 1000                                  | 110.0                                     | 1000             | >100                   | [26] |
| Ni <sub>0.3</sub> -Mg-1                                | 0.5 M Mg(NO <sub>3</sub> ) <sub>2</sub>            | carbon cloths     | 2.00~2.65                           | 2.40                                        | 100                                   | 105.0                                     | 300              | 89.7                   | [27] |
| CuHCF                                                  | 1 M Mg(CH <sub>3</sub> COO) <sub>2</sub>           | Ti                | 2.97~3.37                           | 3.22                                        | 1000                                  | 81.0                                      | 200              | 51.9                   | [28] |
| CuFe-PBA                                               | 1 M Mg(NO <sub>3</sub> ) <sub>2</sub>              | carbon cloths     | 2.87~3.57                           | 3.47                                        | 100                                   | 50.0                                      | N/A              | N/A                    | [29] |
| D-CuHCF@CNTF                                           | 1 M MgCl <sub>2</sub>                              | carbon nanotube   | 2.67~3.57                           | 3.42                                        | 10000                                 | 90.0                                      | 1000             | 67.0                   | [30] |

| Cathode                                                                    | Electrolyte                                           | Current collector | Work Voltage (Mg/Mg <sup>2+</sup> ) | Discharge potential (Mg /Mg <sup>2+</sup> ) | Current density (mA g <sup>-1</sup> ) | Discharge capacity (mAh g <sup>-1</sup> ) | Cycle number (n) | Capacity retention (%) | Ref. |
|----------------------------------------------------------------------------|-------------------------------------------------------|-------------------|-------------------------------------|---------------------------------------------|---------------------------------------|-------------------------------------------|------------------|------------------------|------|
| NiHCF                                                                      | 1 M MgSO <sub>4</sub>                                 | stainless steel   | 2.87~3.17                           | 2.97                                        | 10000                                 | 58                                        | 2000             | 86.2                   | [31] |
| Na <sub>1.4</sub> Cu <sub>1.3</sub> Fe(CN) <sub>6</sub> ·5H <sub>2</sub> O | 1 M MgSO <sub>4</sub>                                 | stainless steel   | 3.22~3.47                           | 3.27                                        | 10000                                 | 60                                        | 1000             | 60                     | [31] |
| Mg <sub>0.75</sub> V <sub>10</sub> O <sub>24</sub> ·4H <sub>2</sub> O      | 2 M Mg(CF <sub>3</sub> SO <sub>3</sub> ) <sub>2</sub> | carbon cloths     | 2.20~3.30                           | 3.2                                         | 3000                                  | 90                                        | 100              | 67                     | [32] |
| V <sub>2</sub> O <sub>5</sub>                                              | PEG-5                                                 | carbon cloths     | 2.20~3.00                           | 2.75                                        | 100                                   | 120                                       | 100              | ~100                   | [33] |
| Li <sub>3</sub> V <sub>2</sub> (PO <sub>4</sub> ) <sub>3</sub>             | 4 M Mg(TFSI) <sub>2</sub>                             | Ti                | 2.72~3.52                           | 3.42                                        | 1000                                  | 105                                       | 1000             | ~85                    | [34] |

**Table S2.** Electrochemical performances of various anodes for AMIBs.

| Anode                                      | Electrolyte                             | Current collector | Work Voltage (Mg/Mg <sup>2+</sup> ) | Discharge potential (Mg/Mg <sup>2+</sup> ) | Current density (mA g <sup>-1</sup> ) | Discharge capacity (mAh g <sup>-1</sup> ) | Cycle number (n) | Capacity retention (%) | Ref. |
|--------------------------------------------|-----------------------------------------|-------------------|-------------------------------------|--------------------------------------------|---------------------------------------|-------------------------------------------|------------------|------------------------|------|
| FeVO <sub>4</sub> ·0.9H <sub>2</sub> O     | 1 M MgSO <sub>4</sub>                   | carbon cloths     | 1.70~2.40                           | 2.10                                       | 100                                   | 98.5                                      | 50               | 75.1                   | [35] |
| FeVO <sub>4</sub> ·0.9H <sub>2</sub> O/rGO | 1 M MgSO <sub>4</sub>                   | carbon cloths     | 1.80~2.40                           | 2.15                                       | 100                                   | 118.2                                     | 50               | 82.5                   | [35] |
| FeVO <sub>4</sub>                          | 1 M MgSO <sub>4</sub>                   | carbon cloths     | 1.50~2.20                           | 1.99                                       | 100                                   | 150.4                                     | 50               | 29.9                   | [36] |
| FeVO <sub>4</sub> /C                       | 1 M MgSO <sub>4</sub>                   | carbon cloths     | 1.50~2.20                           | 2.01                                       | 100                                   | 185.1                                     | 50               | 63.2                   | [37] |
| Polyimide                                  | 1 M MgSO <sub>4</sub>                   | stainless steel   | 2.37~2.67                           | 2.07                                       | 1000                                  | 146.0                                     | 2000             | 90.0                   | [31] |
| PPMDA/MCNTs                                | 4 M Mg(TFSI) <sub>2</sub>               | Ti                | 1.70~2.00                           | 1.80                                       | 100                                   | 110.0                                     | 500              | 87.0                   | [34] |
| 3D-P(PDI-T)                                | 1 M MgCl <sub>2</sub>                   | carbon cloths     | 1.60~2.50                           | 1.90                                       | 5000                                  | 120.0                                     | 5000             | 93.2                   | [38] |
| PTCDI                                      | 0.5 M Mg(NO <sub>3</sub> ) <sub>2</sub> | Ti                | 1.40~2.00                           | 1.90                                       | 500                                   | 75.0                                      | 10000            | 87.2                   | [23] |
| PTCDA                                      | 1 M MgCl <sub>2</sub>                   | carbon cloths     | 2.00~2.13                           | 2.05                                       | 1000                                  | 100.0                                     | 800              | 85.0                   | [10] |
| VO <sub>2</sub>                            | 1 M MgSO <sub>4</sub>                   | carbon cloths     | 1.85~2.10                           | 2.10                                       | 500                                   | 130.3                                     | 100              | 54.3                   | [5]  |
| VO <sub>x</sub>                            | 4.5 M MgCl <sub>2</sub>                 | graphite foil     | 1.90~2.90                           | 2.83                                       | 1300                                  | 200.0                                     | 100              | 98.4                   | [39] |

| Anode                         | Electrolyte                              | Current collector        | Work Voltage (Mg/Mg <sup>2+</sup> ) | Discharge potential (Mg /Mg <sup>2+</sup> ) | Current density (mA g <sup>-1</sup> ) | Discharge capacity (mAh g <sup>-1</sup> ) | Cycle number (n) | Capacity retention (%) | Ref. |
|-------------------------------|------------------------------------------|--------------------------|-------------------------------------|---------------------------------------------|---------------------------------------|-------------------------------------------|------------------|------------------------|------|
| Mn-NaVO                       | MAU117                                   | carbon cloths            | 2.10~2.30                           | 2.10                                        | 500                                   | 105.3                                     | 60               | >100                   | [40] |
| VO <sub>2</sub> (B)           | 1 M Mg(CH <sub>3</sub> COO) <sub>2</sub> | carbon cloths            | 1.60~2.30                           | 2.15                                        | 1000                                  | 257.0                                     | 3000             | 81.5                   | [28] |
| V <sub>2</sub> O <sub>5</sub> | 0.075 M MgCl <sub>2</sub>                | fluorine-doped tin oxide | 1.42~1.72                           | 1.52                                        | 5900                                  | 427.0                                     | 2000             | 82.0                   | [41] |
| TiO <sub>2</sub>              | PEG-5                                    | carbon cloths            | 0.70~1.30                           | 0.88                                        | 500                                   | 157.0                                     | 200              | 70.0                   | [33] |
| MoTe <sub>2</sub>             | 1 M MgCl <sub>2</sub>                    | carbon cloths            | 1.90~2.30                           | 2.40                                        | 1000                                  | 175.0                                     | 250              | 14.2                   | [42] |

**Table S3.** Electrochemical performances of various full cells for AMIBs.

| Cathode                                                                        | Anode                                     | Electrolyte                             | Work<br>voltage<br>(V) | Discharge<br>plateau<br>(V) | Current<br>density<br>(mA g <sup>-1</sup> ) | discharge<br>capacity<br>(mAh g <sup>-1</sup> ) | Cycle<br>number<br>(n) | Capacity<br>retention<br>(%) | Ref. |
|--------------------------------------------------------------------------------|-------------------------------------------|-----------------------------------------|------------------------|-----------------------------|---------------------------------------------|-------------------------------------------------|------------------------|------------------------------|------|
| Mg-OMS-1                                                                       | FeVO <sub>4</sub> 0.9H <sub>2</sub> O/rGO | 1 M MgSO <sub>4</sub>                   | 0.00~1.80              | 0.70                        | 100                                         | 54.3                                            | 100                    | 97.2                         | [35] |
| Mg-OMS-1                                                                       | FeVO <sub>4</sub> /C                      | 1 M MgSO <sub>4</sub>                   | 0.00~1.80              | 0.30                        | 100                                         | 58.9                                            | 100                    | 97.7                         | [36] |
| NiHCF                                                                          | Polyimide                                 | 1 M MgSO <sub>4</sub>                   | 0.00~1.55              | 0.75                        | 500                                         | 35.0                                            | 5000                   | 60.0                         | [31] |
| Na <sub>1.4</sub> Cu <sub>1.3</sub> Fe(CN) <sub>6</sub> ·<br>5H <sub>2</sub> O | Polyimide                                 | 1 M MgSO <sub>4</sub>                   | 0.00~1.55              | 1.10                        | 500                                         | 36.5                                            | 5000                   | 60.0                         | [31] |
| Li <sub>3</sub> V <sub>2</sub> (PO <sub>4</sub> ) <sub>3</sub>                 | PPMDA@MWCNT<br>S                          | 4 M Mg(TFSI) <sub>2</sub>               | 0.40~1.80              | 1.00                        | 2000                                        | 42.0                                            | 6000                   | 92.0                         | [34] |
| Mg-OMS-2/rGO                                                                   | AC                                        | 0.5 M Mg(NO <sub>3</sub> ) <sub>2</sub> | 0.00~2.00              | 0.70                        | 100                                         | 46.0                                            | 500                    | 95.8                         | [43] |
| Mn <sub>3</sub> O <sub>4</sub>                                                 | AC                                        | 2 M MgSO <sub>4</sub>                   | 0.00~2.00              | 0.70                        | 500                                         | 50.0                                            | 6000                   | >100                         | [44] |
| EMgMn <sub>2</sub> O <sub>4</sub> /MWCNTs                                      | AC                                        | 0.5 M MgSO <sub>4</sub>                 | 0.00~2.00              | 0.60                        | 1000                                        | 43.5                                            | 500                    | >100                         | [24] |
| δ-MnO <sub>2</sub> @CMS                                                        | VO <sub>2</sub>                           | 1 M MgSO <sub>4</sub>                   | 0.00~1.80              | 1.30                        | 500                                         | ~100                                            | 100                    | 46.9                         | [5]  |
| Ni <sub>0.3</sub> -Mg-1                                                        | VO <sub>2</sub>                           | 1M MgSO <sub>4</sub>                    | 0.00~1.80              | 0.20                        | 500                                         | 65.0                                            | 100                    | 94.6                         | [27] |



|                                                       |                 |                                                    |                                 |                                      |                                                    |                                                        |                                 |                                       |             |
|-------------------------------------------------------|-----------------|----------------------------------------------------|---------------------------------|--------------------------------------|----------------------------------------------------|--------------------------------------------------------|---------------------------------|---------------------------------------|-------------|
| Mg <sub>2</sub> MnO <sub>4</sub>                      | Polyimide       | 1 M MgSO <sub>4</sub><br>+ 0.1 M MnSO <sub>4</sub> | 0.10~1.60                       | 0.86                                 | 18000                                              | 79.4                                                   | 10000                           | 89                                    | [21]        |
| <b>Cathode</b>                                        | <b>Anode</b>    | <b>Electrolyte</b>                                 | <b>Work<br/>voltage<br/>(V)</b> | <b>Discharge<br/>plateau<br/>(V)</b> | <b>Current<br/>density<br/>(mA g<sup>-1</sup>)</b> | <b>discharge<br/>capacity<br/>(mAh g<sup>-1</sup>)</b> | <b>Cycle<br/>number<br/>(n)</b> | <b>Capacity<br/>retention<br/>(%)</b> | <b>Ref.</b> |
| Li <sub>0.21</sub> MnO <sub>2</sub> ·H <sub>2</sub> O | VO <sub>2</sub> | 0.5 M MgSO <sub>4</sub>                            | 0.00~2.00                       | 0.60                                 | 100                                                | 57.4                                                   | 50                              | 80.5                                  | [13]        |
| δ-MnO <sub>2</sub> /MWCNTs                            | VO <sub>2</sub> | 0.5 M MgSO <sub>4</sub>                            | 0.00~2.20                       | 0.75                                 | 1000                                               | 16.2                                                   | 500                             | >100                                  | [9]         |
| Electro-conversion<br>Mg-birnessite                   | Polyimide       | 0.5 M Mg(ClO <sub>4</sub> ) <sub>2</sub>           | 0.00~2.00                       | 0.75                                 | 500                                                | 42.0                                                   | 500                             | 99.0                                  | [8]         |
| δ-MnO <sub>2</sub> @MWCNTs/CC                         | AC              | 0.5 M MgSO <sub>4</sub>                            | 0.00~1.60                       | 0.80                                 | 1000                                               | 40.0                                                   | 1000                            | >100                                  | [6]         |
| ε-MnO <sub>2</sub>                                    | PTCDA           | 1 M MgCl <sub>2</sub>                              | 0.00~1.60                       | 1.00                                 | 1000                                               | 100.0                                                  | 800                             | 72.6                                  | [10]        |
| MMO                                                   | PTCDI           | 1 M MgCl <sub>2</sub>                              | 0.00~1.80                       | 1.10                                 | 200                                                | ~100.0                                                 | 400                             | >100                                  | [45]        |
| MnO <sub>2</sub>                                      | VO <sub>x</sub> | 4.5 M MgCl <sub>2</sub>                            | 0.01~2.10                       | 1.00                                 | 2600                                               | 33.0                                                   | 1000                            | 84.5                                  | [39]        |
| Flower-like MgMn <sub>2</sub> O <sub>4</sub>          | PTCDI           | 0.5 M Mg(NO <sub>3</sub> ) <sub>2</sub>            | 0.20 ~1.50                      | 0.75                                 | 1000                                               | 124.8                                                  | 5000                            | 80.9                                  | [23]        |
| MgMn <sub>2</sub> O <sub>4</sub> -7.5/MWCNTs          | VO <sub>2</sub> | 0.5 M MgSO <sub>4</sub>                            | 0.00~1.90                       | 0.70                                 | 1000                                               | 18.4                                                   | 500                             | ~100                                  | [22]        |
| <b>Cathode</b>                                        | <b>Anode</b>    | <b>Electrolyte</b>                                 | <b>Work</b>                     | <b>Discharge</b>                     | <b>Current</b>                                     | <b>discharge</b>                                       | <b>Cycle</b>                    | <b>Capacity</b>                       | <b>Ref.</b> |

|                                                                       |                                      |                                                                 | voltage<br>(V) | plateau<br>(V) | density<br>(mA g <sup>-1</sup> ) | capacity<br>(mAh g <sup>-1</sup> ) | number<br>(n) | retention<br>(%) |      |
|-----------------------------------------------------------------------|--------------------------------------|-----------------------------------------------------------------|----------------|----------------|----------------------------------|------------------------------------|---------------|------------------|------|
| CuHCF                                                                 | Mg                                   | MgCl <sub>2</sub> ·6H <sub>2</sub> O WIS                        | 1.20~2.40      | 2.30           | 500                              | 35.0                               | 700           | 65.0             | [46] |
| CuHCF                                                                 | Mg                                   | MgCl <sub>2</sub> -PEO QSSEs                                    | 1.60~2.60      | 2.20           | 250                              | 120.0                              | 800           | 88.0             | [47] |
| MnO <sub>2</sub>                                                      | Mg                                   | SIW2                                                            | 1.40~2.80      | 2.5            | 5000                             | 500                                | 1200          | ~99              | [48] |
| CuHCF                                                                 | V <sub>2</sub> O <sub>5</sub> (B)    | 1 M Mg(CH <sub>3</sub> COO) <sub>2</sub>                        | 0.10~1.70      | 1.10           | 5000                             | 210.7                              | 500           | 67.3             | [28] |
| CuHCF                                                                 | Mn-NaVO                              | MAU117                                                          | 0.01~1.40      | 0.90           | 1000                             | 40.0                               | 800           | >100             | [40] |
| Buserite Mg-Mn oxide                                                  | AC                                   | 0.5 M MgCl <sub>2</sub>                                         | 0.00~1.80      | 1.20           | 1000                             | 70.0                               | 1000          | 100              | [19] |
| Mg <sub>0.75</sub> V <sub>10</sub> O <sub>24</sub> ·4H <sub>2</sub> O | PTCDA                                | Mg(CF <sub>3</sub> SO <sub>3</sub> ) <sub>2</sub> -PEO          | 0.00~1.70      | 0.70           | 4000                             | 60.0                               | 5000          | 62.0             | [32] |
| Mg <sub>2</sub> MnO <sub>4</sub>                                      | 3D-P(PDI-T)                          | 1.0 M MgCl <sub>2</sub>                                         | 0.00~1.80      | 1.50           | 500                              | 148.0                              | 5000          | 100              | [38] |
| Mg <sub>x</sub> CuHCF                                                 | PTCDI                                | 1 M Mg(TFSI) <sub>2</sub>                                       | 0.00~2.20      | 1.50           | 1000                             | 97                                 | 2000          | 56.3             | [49] |
| δ-MnO <sub>2</sub> /rGO                                               | PTCDI                                | 2 M MgSO <sub>4</sub> +2 M Mg(CH <sub>3</sub> COO) <sub>2</sub> | 0.00~2.00      | 1.14           | 2000                             | 16.5                               | 3000          | 76.4             | [50] |
| δ-MnO <sub>2</sub>                                                    | VO <sub>2</sub>                      | 4 M MgCl <sub>2</sub>                                           | 0.00~1.70      | 1.50           | 2000                             | 42.0                               | 1000          | 100              | [51] |
| NaMnTiO-5                                                             | AC                                   | 0.5 M MgCl <sub>2</sub>                                         | 0.00~1.80      | 1.50           | 1000                             | 125.0                              | 1000          | 90.4             | [26] |
| V <sub>2</sub> O <sub>5</sub>                                         | Mg <sub>x</sub> TiO <sub>2</sub> (B) | PEG-5                                                           | 0.10~2.45      | 1.70           | 100                              | 57.0                               | 200           | >100             | [33] |

## References

1. Yuan, C.; Zhang, Y.; Pan, Y.; Liu, X.; Wang, G.; Cao, D., Investigation of the intercalation of polyvalent cations ( $Mg^{2+}$ ,  $Zn^{2+}$ ) into  $\lambda$ - $MnO_2$  for rechargeable aqueous battery. *Electrochim. Acta* **2014**, *116*, 404-412.
2. Zhang, D.; Li, D.; Zhang, J.; Sun, T., High-performance and low-cost manganese oxide/multiwalled carbon nanotubes composite as cathode material for aqueous magnesium ion battery. *J. Electroanal. Chem.* **2021**, *901*, 115764.
3. Nam, K. W.; Kim, S.; Lee, S.; Salama, M.; Shterenberg, I.; Gofer, Y.; Kim, J.-S.; Yang, E.; Park, C. S.; Kim, J.-S.; Lee, S.-S.; Chang, W.-S.; Doo, S.-G.; Jo, Y. N.; Jung, Y.; Aurbach, D.; Choi, J. W., The high performance of crystal water containing manganese birnessite cathodes for magnesium batteries. *Nano Lett.* **2015**, *15* (6), 4071-4079.
4. Wu, C.; Zhao, G.; Bao, X.; Chen, X.; Sun, K., Hierarchically porous delta-manganese dioxide films prepared by an electrochemically assistant method for Mg ion battery cathodes with high rate performance. *J. Alloy Compd.* **2019**, *770*, 914-919.
5. Zhang, H.; Cao, D.; Bai, X., High rate performance of aqueous magnesium-ion batteries based on the  $\delta$ - $MnO_2$ @carbon molecular sieves composite as the cathode and nanowire  $VO_2$  as the anode. *J. Power Sources* **2019**, *444*, 227299.
6. Zhang, D.; Ma, Y.; Zhang, J.; Sun, T., Binder-free and flexible delta- $MnO_2$ @multiwalled carbon nanotubes as high-performance cathode material for aqueous magnesium ion battery. *Nanotechnology* **2021**, *32* (44), 445401.
7. Jia, Z.; Hao, J.; Liu, L.; Wang, Y.; Qi, T., Vertically aligned  $\alpha$ - $MnO_2$  nanosheets on carbon nanotubes as cathodic materials for aqueous rechargeable magnesium ion battery. *Ionics* **2018**, *24* (11), 3483-3491.
8. Shi, Z.; Xue, L.; Wu, J.; Guo, Q.; Xia, Q.; Ni, M.; Wang, P.; Savilov, S. V.; Aldoshin, S. M.; Zan, F.; Xia, H., Hierarchical Mg-birnessite nanowall arrays with enriched (010) planes for high performance aqueous Mg-ion batteries. *J. Electrochem. Soc.* **2021**, *168* (12), 120549.
9. Zhang, D.; Huang, W.; Chen, T.; Wang, Q.; Sun, T., Facile synthesis of  $MnO_2$ /MWCNTs via UV photolysis as high-performance and low-cost cathodes for aqueous magnesium ion batteries. *ACS Appl. Energy Mater.* **2021**, *4* (7), 6853-6865.
10. Liu, Z.; Zhou, W.; He, J.; Chen, H.; Zhang, R.; Wang, Q.; Wang, Y.; Yan, Y.; Chen, Y., Binder-free  $MnO_2$  as a high rate capability cathode for aqueous magnesium ion battery. *J. Alloy Compd.* **2021**, *869*, 159279.
11. Pan, Z.; Qin, T.; Zhang, W.; Chu, X.; Dong, T.; Yue, N.; Wang, Z.; Zheng, W., Non-layer-transformed  $Mn_3O_4$  cathode unlocks optimal aqueous magnesium-ion storage via synergizing amorphous ion channels and grain refinement. *J. Energy Chem.* **2022**, *68*, 42-48.
12. Sinha, N. N.; Munichandraiah, N., Electrochemical conversion of  $LiMn_2O_4$  to  $MgMn_2O_4$  in aqueous electrolytes. *Electrochem. Solid-State Lett.* **2008**, *11* (11), F23.
13. Bai, X.; Cao, D.; Jiang, Z.; Zhang, H., Exploration of hydrated lithium manganese oxide with a nanoribbon structure as cathodes in aqueous lithium ion and magnesium ion batteries. *Inorg Chem Front* **2022**, *9* (3), 485-493.
14. Zhang, Y.; Cheng, K.; Ye, K.; Gao, Y.; Zhao, W.; Wang, G.; Cao, D., Preparation of  $M_{1/3}Ni_{1/3}Mn_{2/3}O_2$  (M=Mg or Zn) and its performance as the cathode material of aqueous divalent cations battery. *Electrochim. Acta* **2015**, *182*, 971-978.
15. Zhang, H.; Ye, K.; Shao, S.; Wang, X.; Cheng, K.; Xiao, X.; Wang, G.; Cao, D., Octahedral

magnesium manganese oxide molecular sieves as the cathode material of aqueous rechargeable magnesium-ion battery. *Electrochim. Acta.* **2017**, *229*, 371-379.

16. Zhang, H.; Ye, K.; Cang, R.; Zhu, K.; Yan, J.; Cheng, K.; Wang, G.; Cao, D., The synthesis of 1×1 magnesium octahedral molecular sieve with controllable size and shape for aqueous magnesium ion battery cathode material. *J. Electroanal. Chem.* **2017**, *807*, 37-44.

17. Li, Z.; Chen, Y.; Gong, Z.; Liu, Y.; Wang, G.; Gao, Y.; Zhu, K.; Cao, D., Boosting magnesium ion storage behavior via heteroelement doping in a porous tunnel framework cathode for aqueous Mg-ion batteries. *Chem.-Asian J.* **2023**, *18* (12), e202300208.

18. Liu, G.; Chi, Q.; Zhang, Y.; Chen, Q.; Zhang, C.; Zhu, K.; Cao, D., Superior high rate capability of MgMn<sub>2</sub>O<sub>4</sub>/rGO nanocomposites as cathode materials for aqueous rechargeable magnesium ion batteries. *Chem. Commun.* **2018**, *54* (68), 9474-9477.

19. Sun, C.; Wang, H.; Yang, F.; Tang, A.; Huang, G.; Li, L.; Wang, Z.; Qu, B.; Xu, C.; Tan, S.; Zhou, X.; Wang, J.; Pan, F., Layered buserite Mg-Mn oxide cathode for aqueous rechargeable Mg-ion battery. *J. Magnes. Alloy.* **2023**, *11* (3), 840-850.

20. Tao, S.; Huang, W.; Liu, Y.; Chen, S.; Qian, B.; Song, L., Three-dimensional hollow spheres of the tetragonal-spinel MgMn<sub>2</sub>O<sub>4</sub> cathode for high-performance magnesium ion batteries. *J. Mater. Chem. A* **2018**, *6* (18), 8210-8214.

21. Sun, T.; Du, H.; Zheng, S.; Tao, Z., Inverse-spinel Mg<sub>2</sub>MnO<sub>4</sub> material as cathode for high-performance aqueous magnesium-ion battery. *J. Power Sources* **2021**, *515*, 230643.

22. Zhang, D.; Du, D.; Zhang, J.; Feng, Z.; Sun, T., Porous spinel magnesium manganese oxide/multiwalled carbon nanotubes composite synthesized by electrochemical conversion as high-performance cathode for aqueous magnesium ion battery. *J. Electrochem. Soc.* **2022**, *169* (4), 040530.

23. Wen, B.; Yang, C.; Wu, J.; Liu, J.; Wang, W.; Yang, J.; Chi, X.; Liu, Y., Water-induced 3D MgMn<sub>2</sub>O<sub>4</sub> assisted by unique nanofluidic effect for energy-dense and durable aqueous magnesium-ion batteries. *Chem. Eng. J.* **2022**, *435*, 134997.

24. Zhang, D.; Chen, Q.; Zhang, J.; Sun, T., MgMn<sub>2</sub>O<sub>4</sub>/multiwalled carbon nanotubes composite fabricated by electrochemical conversion as a high-performance cathode material for aqueous rechargeable magnesium ion battery. *J. Alloy Compd.* **2021**, *873*, 159872.

25. Zhang, Y.; Liu, G.; Zhang, C.; Chi, Q.; Zhang, T.; Feng, Y.; Zhu, K.; Zhang, Y.; Chen, Q.; Cao, D., Low-cost MgFe<sub>x</sub>Mn<sub>2-x</sub>O<sub>4</sub> cathode materials for high-performance aqueous rechargeable magnesium-ion batteries. *Chem. Eng. J.* **2020**, *392*, 123652.

26. Zhang, Y.; Ding, T.; Wang, J.; Yao, A.; Zhang, C.; Zhang, T.; Zhang, Y.; Feng, Y.; Chi, Q., Improvements in the electrochemical performance of sodium manganese oxides by Ti doping for Aqueous Mg-ion batteries. *Chem.-Asian J.* **2023**, *18* (20), e202300542.

27. Zhang, H.; Cao, D.; Bai, X., Ni-Doped magnesium manganese oxide as a cathode and its application in aqueous magnesium-ion batteries with high rate performance. *Inorg. Chem. Front.* **2020**, *7* (11), 2168-2177.

28. Huang, M.; Wang, X.; Wang, J.; Meng, J.; Liu, X.; He, Q.; Geng, L.; An, Q.; Yang, J.; Mai, L., Proton/Mg<sup>2+</sup> co-Insertion chemistry in aqueous Mg-ion batteries: from the interface to the inner. *Angew. Chem.-Int. Edit.* **2023**, *62* (37), e202308961.

29. Mizuno, Y.; Okubo, M.; Hosono, E.; Kudo, T.; Oh-ishi, K.; Okazawa, A.; Kojima, N.; Kurono, R.; Nishimura, S.-i.; Yamada, A., Electrochemical Mg<sup>2+</sup> intercalation into a bimetallic CuFe Prussian blue analog in aqueous electrolytes. *J. Mater. Chem. A* **2013**, *1* (42), 13055-13059.

30. Ling, Y.; He, B.; Han, L.; Gong, W.; Chang, C.; Zhang, Q., Two-electron redox chemistry

enables potassium-free copper hexacyanoferrate as high-capacity cathode for aqueous Mg-ion battery. *InfoMat* **2024**, *n/a* (n/a), e12549.

31. Chen, L.; Bao, J. L.; Dong, X.; Truhlar, D. G.; Wang, Y.; Wang, C.; Xia, Y., Aqueous Mg-ion battery based on polyimide anode and prussian blue cathode. *ACS Energy Lett.* **2017**, *2* (5), 1115-1121.

32. Ma, X.-F.; Zhao, B.-Q.; Liu, H.; Tan, J.; Li, H.-Y.; Zhang, X.; Diao, J.; Yue, J.; Huang, G.; Wang, J.; Pan, F., H<sub>2</sub>O-Mg<sup>2+</sup> waltz-Like shuttle enables high-capacity and ultralong-Life magnesium-ion batteries. *Adv. Sci.* **2024**, *n/a* (n/a), 2401005.

33. Sun, C.; Huang, G.; Xu, C.; Li, L.; Tang, A.; Zhou, X.; Wang, J.; Pan, F., Improved compatibility of aqueous electrolyte with TiO<sub>2</sub>(B) toward high-voltage aqueous rechargeable Mg-ion batteries. *Energy Storage Mater.* **2024**, *66*, 103197.

34. Wang, F.; Fan, X.; Gao, T.; Sun, W.; Ma, Z.; Yang, C.; Han, F.; Xu, K.; Wang, C., High-voltage aqueous magnesium ion batteries. *ACS Central Sci.* **2017**, *3* (10), 1121-1128.

35. Zhang, H.; Ye, K.; Zhu, K.; Cang, R.; Yan, J.; Cheng, K.; Wang, G.; Cao, D., The FeVO<sub>4</sub>·0.9H<sub>2</sub>O/graphene composite as anode in aqueous magnesium ion battery. *Electrochim. Acta* **2017**, *256*, 357-364.

36. Zhang, H.; Ye, K.; Zhu, K.; Cang, R.; Yan, J.; Cheng, K.; Wang, G.; Cao, D., High-energy-density aqueous magnesium-ion battery based on a carbon-coated FeVO<sub>4</sub> anode and a Mg-OMS-1 cathode. *Chem. Eur. J.* **2017**, *23* (67), 17118-17126.

37. Zhang, S.; Wang, Y.; Sun, Y.; Wang, Y.; Yang, Y.; Zhang, P.; Lv, X.; Wang, J.; Zhu, H.; NuLi, Y., High-energy aqueous magnesium ion batteries with capacity-compensation evolved from dynamic copper ion redox. *Small* **2023**, *19* (21), 2300148.

38. Cang, R.; Zhang, M.; Zhou, X.; Zhu, K.; Zhang, X.; Cao, D., A high-rate and long-life aqueous rechargeable Mg-ion battery based on an organic anode integrating diimide and triazine. *ChemSusChem* **2023**, *16* (10), e202202347.

39. Tian, Y.; Liu, N.; Otitoju, T. A.; Wang, Y.; Feng, Z.; Sun, T., H<sup>+</sup>/Mg<sup>2+</sup> dual ions insertion mechanism in vanadium oxide nanosheet anode for aqueous magnesium-ion batteries. *J. Energy Storage* **2023**, *72*, 108357.

40. Song, X.; Ge, Y.; Xu, H.; Bao, S.; Wang, L.; Xue, X.; Yu, Q.; Xing, Y.; Wu, Z.; Xie, K.; Zhu, T.; Zhang, P.; Liu, Y.; Wang, Z.; Tie, Z.; Ma, J.; Jin, Z., Ternary eutectic electrolyte-assisted formation and dynamic breathing effect of the solid-electrolyte interphase for high-stability aqueous magnesium-ion full batteries. *J. Am. Chem. Soc.* **2024**, *146* (10), 7018-7028.

41. Drosos, C.; Jia, C.; Mathew, S.; Palgrave, R. G.; Moss, B.; Kafizas, A.; Vernardou, D., Aerosol-assisted chemical vapor deposition of V<sub>2</sub>O<sub>5</sub> cathodes with high rate capabilities for magnesium-ion batteries. *J. Power Sources* **2018**, *384*, 355-359.

42. Nandi, S.; Yan, Y.; Yuan, X.; Wang, C.; He, X.; Li, Y.; Das, S. K., Investigation of reversible metal ion (Li<sup>+</sup>, Na<sup>+</sup>, Mg<sup>2+</sup>, Al<sup>3+</sup>) insertion in MoTe<sub>2</sub> for rechargeable aqueous batteries. *Phys. Chem. Chem. Phys.* **2023**, *25* (20), 13833-13837.

43. Zhang, H.; Ye, K.; Zhu, K.; Cang, R.; Wang, X.; Wang, G.; Cao, D., Assembly of aqueous rechargeable magnesium ions battery capacitor: the nanowire Mg-OMS-2/graphene as cathode and activated carbon as anode. *ACS Sustain. Chem. Eng.* **2017**, *5* (8), 6727-6735.

44. Cao, X.; Wang, L.; Chen, J.; Zheng, J., Low-cost aqueous magnesium-ion battery capacitor with commercial Mn<sub>3</sub>O<sub>4</sub> and activated carbon. *ChemElectroChem* **2018**, *5* (19), 2789-2794.

45. Zhao, Y.; Wang, B.; Shi, M.; An, S.; Zhao, L.; Yan, C., Mg-intercalation engineering of MnO<sub>2</sub> electrode for high-performance aqueous magnesium-ion batteries. *Int. J. Min. Met. Mater.* **2022**, *29*

(11), 1954-1962.

46. Leong, K. W.; Pan, W.; Wang, Y.; Luo, S.; Zhao, X.; Leung, D. Y. C., Reversibility of a high-voltage, Cl<sup>-</sup>-regulated, aqueous Mg metal battery enabled by a water-in-salt electrolyte. *ACS Energy Lett.* **2022**, *7* (8), 2657-2666.
47. Leong, K. W.; Pan, W.; Yi, X.; Luo, S.; Zhao, X.; Zhang, Y.; Wang, Y.; Mao, J.; Chen, Y.; Xuan, J.; Wang, H.; Leung, D. Y. C., Next-generation magnesium-ion batteries: The quasi-solid-state approach to multivalent metal ion storage. *Sci. Adv.* **9** (32), eadh1181.
48. Xu, Y.; Liu, Z.; Zheng, X.; Li, K.; Wang, M.; Yu, W.; Hu, H.; Chen, W., Solid electrolyte interface regulated by solvent-in-water electrolyte enables high-voltage and stable aqueous Mg-MnO<sub>2</sub> batteries. *Adv. Energy Mater.* **2022**, *12* (22), 2103352.
49. Zhou, R.; Fan, K.; Hou, Z.; Liu, Q.; Huang, H.; Zhang, B., Synergistic proton and Mg<sup>2+</sup>/Ca<sup>2+</sup> insertion boosting aqueous divalent ion batteries. *Energy Storage Mater.* **2023**, *63*, 103012.
50. Tsai, Y.-R.; Chen, T.-Y.; Yang, Z.-Q.; Tsai, C.-C.; Huang, Y.-T.; Anuratha, K. S.; Lin, T.-W.; Sofer, Z.; Lin, J.-Y., Studying δ-MnO<sub>2</sub>/reduced graphene oxide composite cathode in a low-temperature and high-voltage-tolerant hybrid electrolyte for aqueous Mg-ion batteries. *2D Mater.* **2023**, *10* (2), 024001.
51. Yang, G.; Xu, X.; Qu, G.; Deng, J.; Zhu, Y.; Fang, C.; Fontaine, O.; Hiralal, P.; Zheng, J.; Zhou, H., An aqueous magnesium-ion battery working at -50 °C enabled by modulating electrolyte structure. *Chem. Eng. J.* **2023**, *455*, 140806.
